# Supplementary material for: Excellent electrochemical performance of LiFe0.4Mn0.6PO4microspheres produced using a double carbon coating process
Source: Royal Society of Chemistry journal article supplement (doi:10.1039/c4ta03994g), 2014-01-01
Supplement: c4ta03994g1.pdf [file c4ta03994g1.pdf]

Electronic Supplementary Information (ESI)

**Excellent Electrochemical Performance of  $\text{LiFe}_{0.4}\text{Mn}_{0.6}\text{PO}_4$  Microspheres Produced Using Double Carbon Coating Process**

Yong Ping Huang,<sup>a</sup> Tao Tao,<sup>b</sup> Zheng Chen,<sup>a</sup> Wei Han,<sup>c</sup> Ying Wu,<sup>a</sup> Chunjiang Kuang,<sup>a</sup> Shaoxiong Zhou<sup>a</sup> and Ying Chen<sup>\*b</sup>

<sup>a</sup> China-Australia Energy Nanomaterials Joint Research Centre, Advance Technology & Materials Co., Ltd, China Iron & steel Research Institute Group, Beijing 100081, P.R. China.

<sup>b</sup> Institute for Frontier Materials, Deakin University, Waurn Ponds, Victoria 3216, Australia.

<sup>c</sup> China Iron & steel Research Institute Group, Beijing 100081, P.R. China.

\*: corresponding author. Tel: +61 3 52273243

E-mail addresses: [ian.chen@deakin.edu.au](mailto:ian.chen@deakin.edu.au)

**Table S1** Crystallographic parameters of the double carbon coated  $\text{LiFe}_{0.4}\text{Mn}_{0.6}\text{PO}_4$  selected from the Rietveld refinement results (Space group: Pnma)

| Type             | Wyck. | x/a       | y/b       | z/c       | Occ |
|------------------|-------|-----------|-----------|-----------|-----|
| $\text{Li}^+$    | 4a    | 0.0000    | 0.0000    | 0.0000    | 1.0 |
| $\text{Fe}^{2+}$ | 4c    | 0.2822(1) | 0.2500    | 0.9723(4) | 0.4 |
| $\text{Mn}^{2+}$ | 4c    | 0.2822(1) | 0.2500    | 0.9723(4) | 0.6 |
| P                | 4c    | 0.0924(3) | 0.2500    | 0.4048(6) | 1.0 |
| $\text{O}^{2-}$  | 4c    | 0.1014(5) | 0.2500    | 0.7328(9) | 1.0 |
| $\text{O}^{2-}$  | 4c    | 0.4559(6) | 0.2500    | 0.2162(7) | 1.0 |
| $\text{O}^{2-}$  | 8d    | 0.1645(4) | 0.0390(6) | 0.2791(6) | 1.0 |

Cell : a=10.4060(4) Å, b=6.0663(2) Å, c=4.7253(2) Å, V=298.29(2) Å<sup>3</sup>

Agreement Factors : Rp =21.9% Rwp =12.1% Rexp=10.41% Chi2=1.34

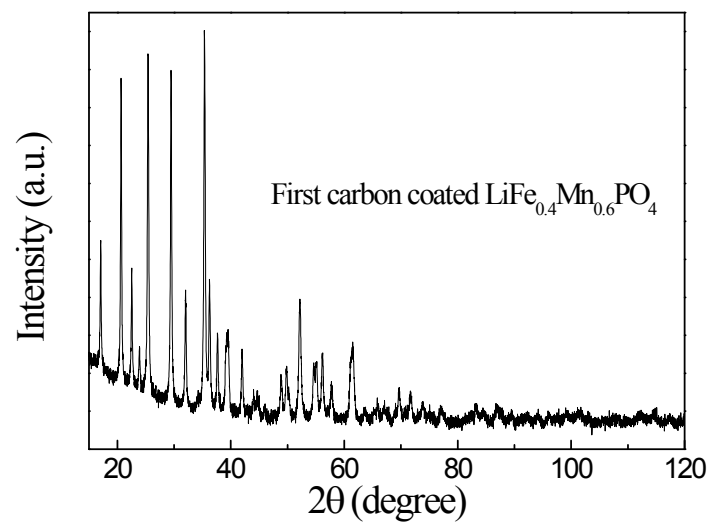

**Fig S1.** XRD pattern of the first carbon coated samples

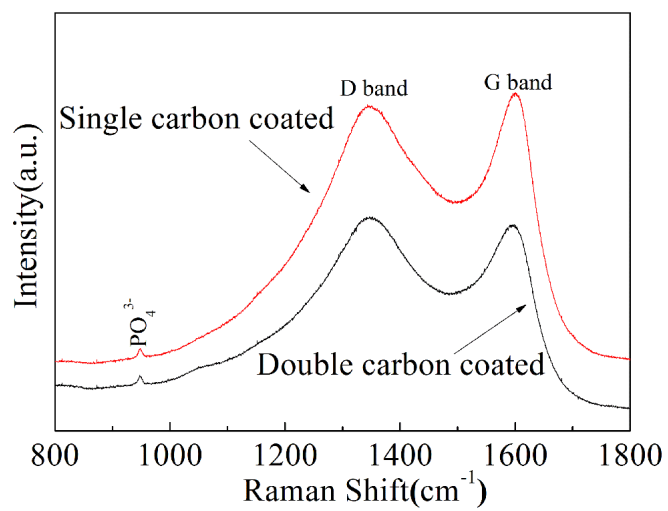

**Fig. S2** Typical Raman spectrum of the double and single carbon coated LiFe<sub>0.4</sub>Mn<sub>0.6</sub>PO<sub>4</sub>

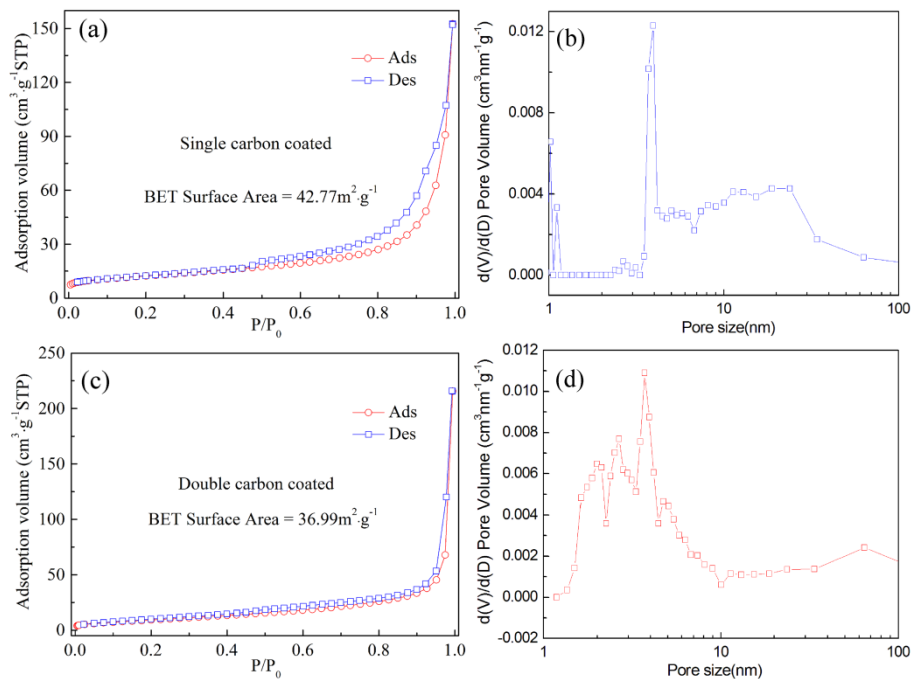

**Fig. S3** Nitrogen adsorption/desorption isotherms and pore-size distribution (BJH curves) of the (a, b) single and (c, d) double carbon coated  $\text{LiFe}_{0.4}\text{Mn}_{0.6}\text{PO}_4$

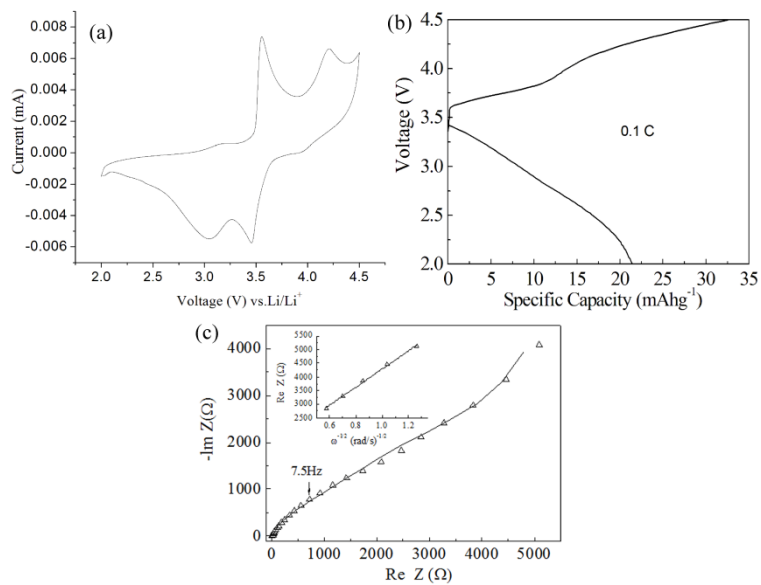

**Fig. S4** CV curves (a), the first charge/discharge curves at a current density of 0.1 C (b), and the electrochemical impedance spectra (c), inset: the plots of the real part of impedance as a function of the inverse square root of angular frequency for the  $\text{LiFe}_{0.4}\text{Mn}_{0.6}\text{PO}_4$  without carbon coating.
